# Supplementary material
Source: PubMed Central journal article supplement (PMC8548921)
Supplement: mmc1.pdf [file mmc1.pdf]

| Category      | Clinical status                                                                                                                                                                                                                    | Suggested action                                                                                                                                                                                                                                                                                                                                                                                |
|---------------|------------------------------------------------------------------------------------------------------------------------------------------------------------------------------------------------------------------------------------|-------------------------------------------------------------------------------------------------------------------------------------------------------------------------------------------------------------------------------------------------------------------------------------------------------------------------------------------------------------------------------------------------|
| <b>Green</b>  | RR $\geq$ 20bpm with SpO <sub>2</sub> $\leq$ 94%                                                                                                                                                                                   | Administer O <sub>2</sub> < 40% by face mask.<br>If SpO <sub>2</sub> rises to > 94%, observe and monitor                                                                                                                                                                                                                                                                                        |
| <b>Yellow</b> | RR $\geq$ 20bpm with SpO <sub>2</sub> $\leq$ 94% on FiO <sub>2</sub> $\leq$ 40%                                                                                                                                                    | Start 15L/min via non-rebreath mask<br><br><i>Senior clinical review to consider:</i><br><br>If orientated and able to tolerate well-fitted non-vented face mask, trial CPAP 10cmH <sub>2</sub> O with FiO <sub>2</sub> 0.6<br><br>If further escalation appropriate, consider increasing CPAP 12-15 cmH <sub>2</sub> O + 60-100% oxygen if needed<br><br>If not, IMV if in accordance with TEP |
| <b>Red</b>    | RR $\geq$ 20bpm with SpO <sub>2</sub> $\leq$ 94% on 15L/min O <sub>2</sub> via non-rebreath mask and/or patient unable to tolerate CPAP mask, obtunded, disorientated, rising FiO <sub>2</sub> needs, significant clinical decline | Urgent critical care review and prepare for intubation if in accordance with TEP                                                                                                                                                                                                                                                                                                                |

Abbreviations: RR = respiratory rate; SpO<sub>2</sub> = oxygen saturation; CPAP = continuous positive airway pressure; FiO<sub>2</sub> = fraction of inspired oxygen, IMV = invasive mechanical ventilation, TEP = treatment escalation plan

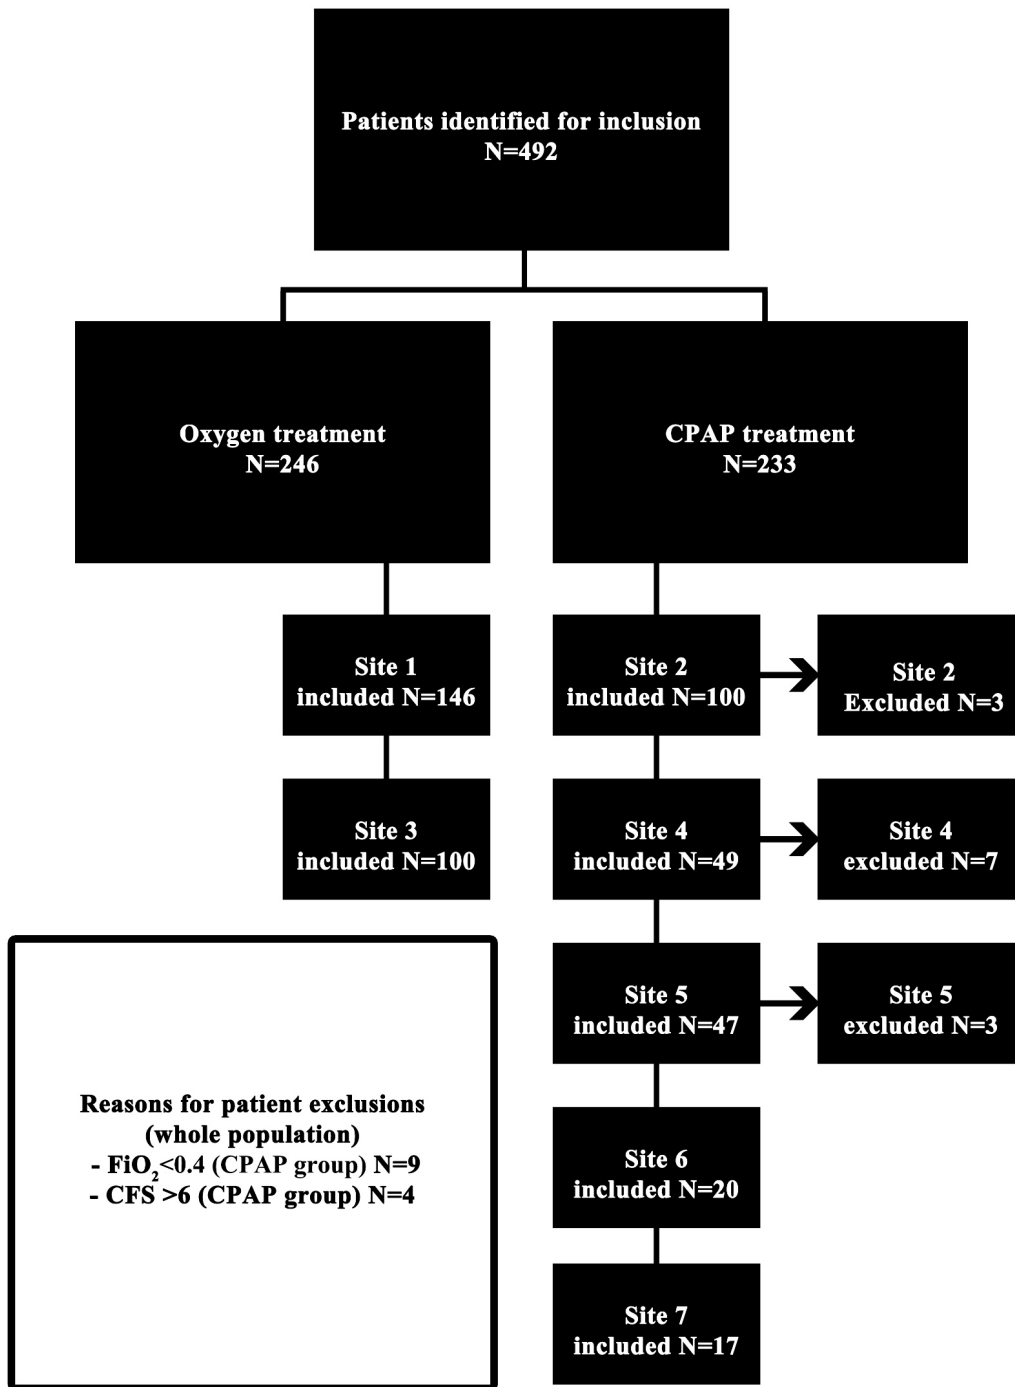

Supplementary figure 2.tif

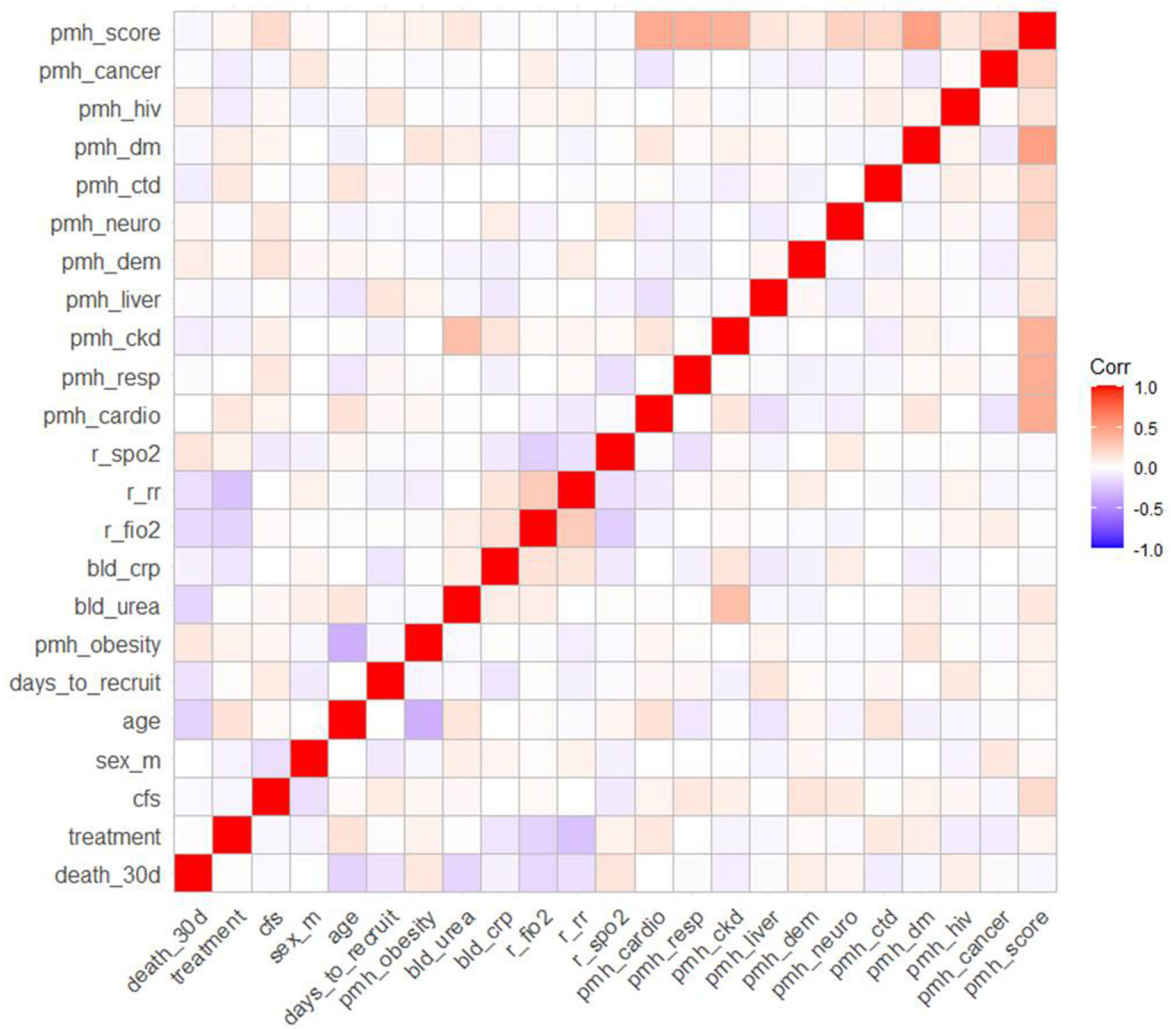

Supplementary figure 3 LZW.tif

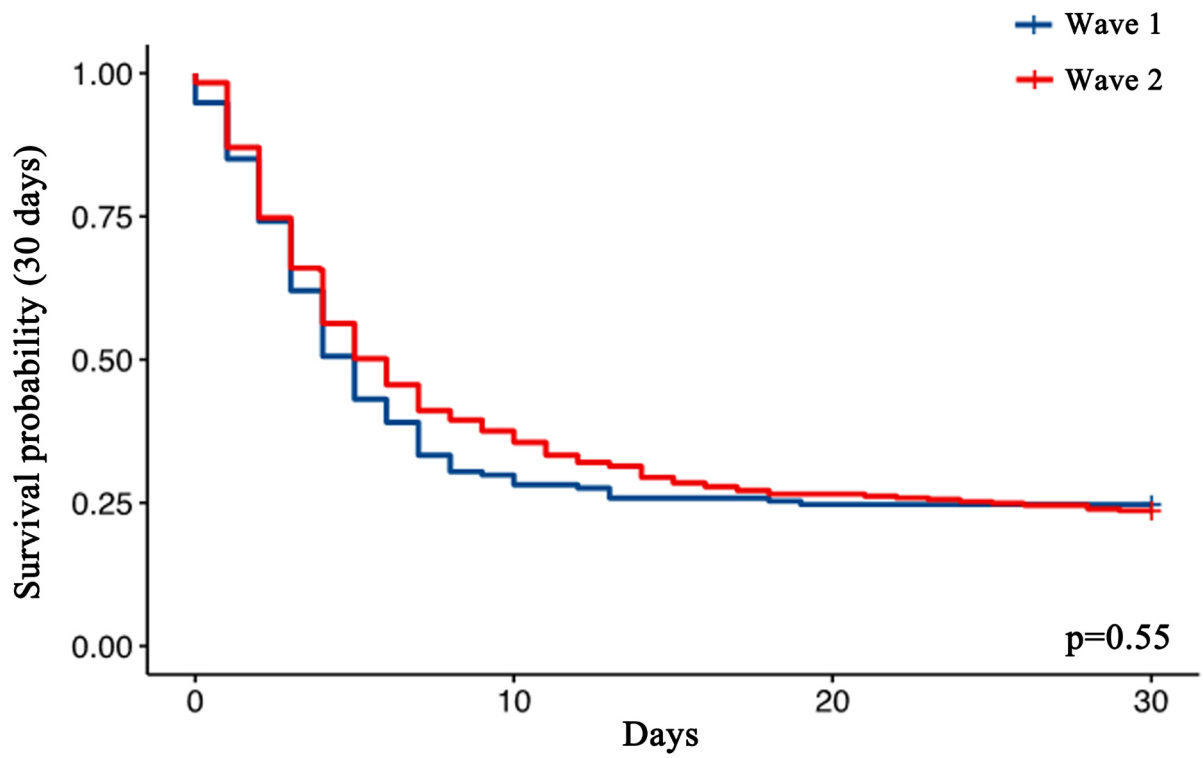

Numbers at risk

|        | 0   | 10  | 20 | 30 |
|--------|-----|-----|----|----|
| Wave 1 | 171 | 52  | 43 | 43 |
| Wave 2 | 308 | 116 | 82 | 73 |

Days

Supplementary figure 4 survival by wave flat.tif

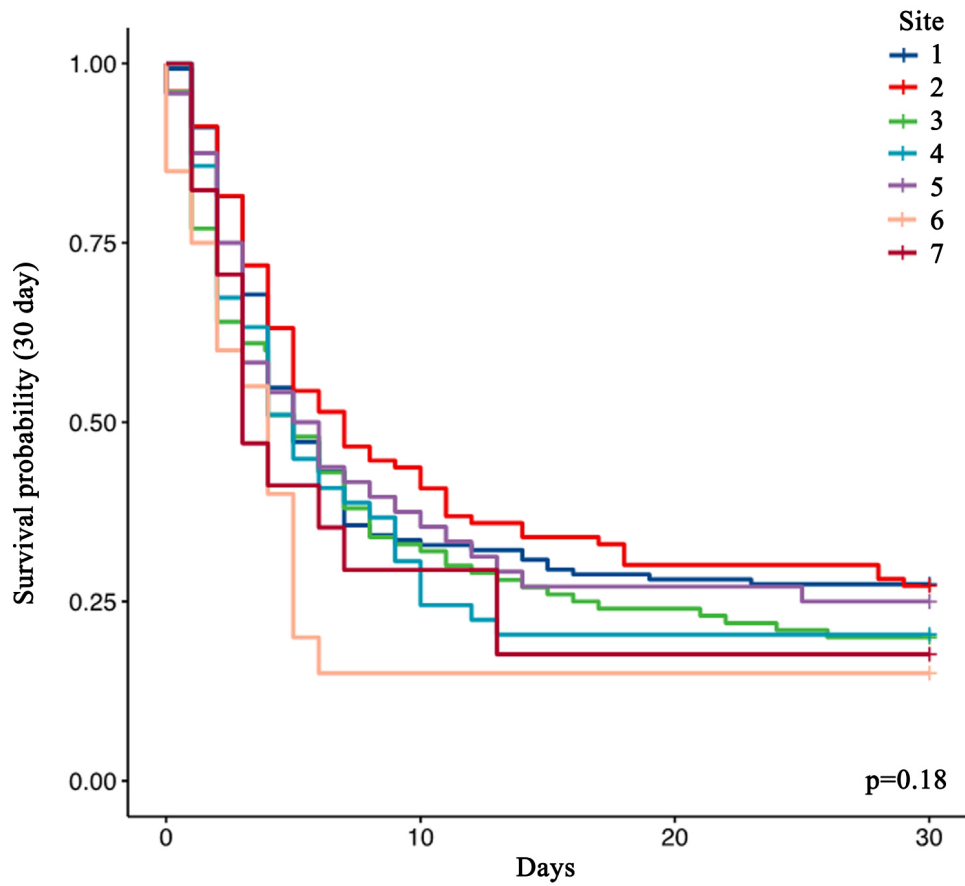

Number at risk

|        | 0   | 10 | 20 | 30 |
|--------|-----|----|----|----|
| site 1 | 146 | 49 | 41 | 40 |
| site 2 | 100 | 45 | 31 | 28 |
| site 3 | 100 | 33 | 24 | 20 |
| site 4 | 49  | 15 | 10 | 10 |
| site 5 | 47  | 18 | 13 | 12 |
| site 6 | 20  | 3  | 3  | 3  |
| site 7 | 17  | 5  | 3  | 3  |

Days

Supplementary figure 5 LZW.tif

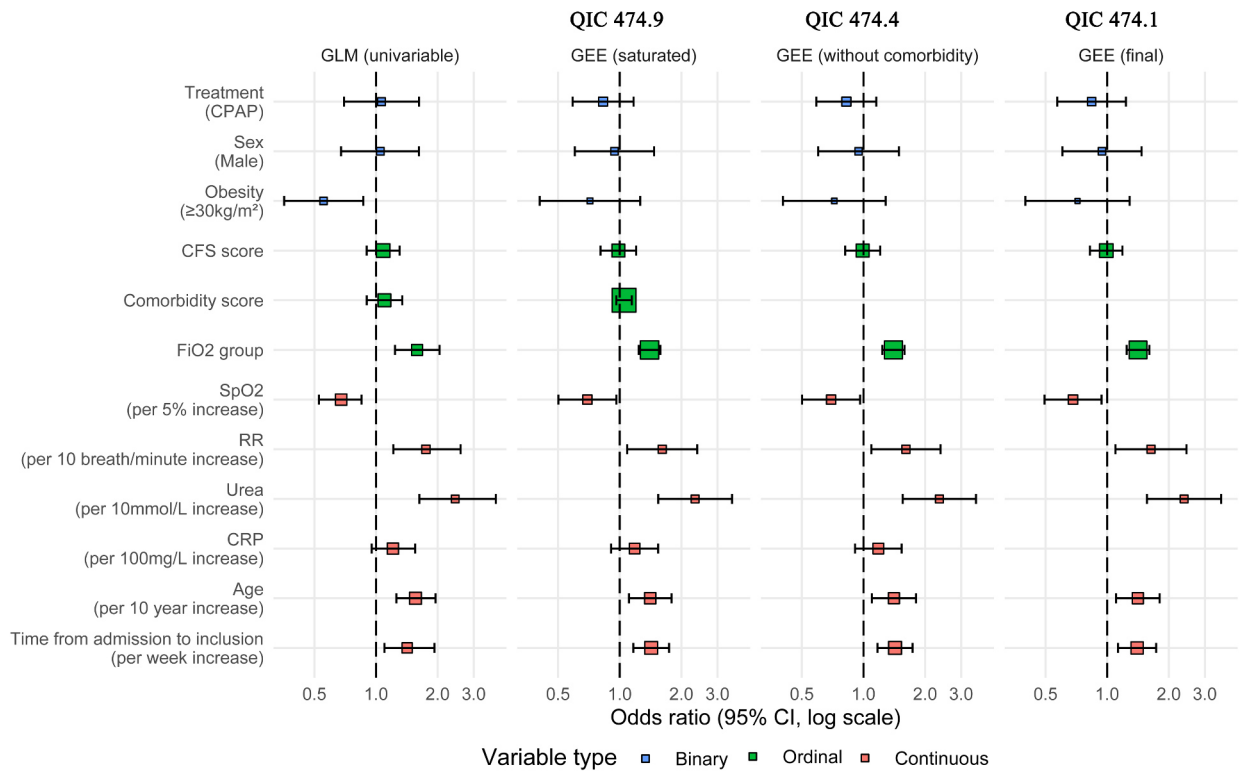

Supplementary figure 6 LZW.tif

| Variable                                       | Overall, N = 479 <sup>1</sup> | Death by 30 days          |                          | p-value <sup>2</sup> |
|------------------------------------------------|-------------------------------|---------------------------|--------------------------|----------------------|
|                                                |                               | Yes, N = 365 <sup>1</sup> | No, N = 114 <sup>1</sup> |                      |
| <b>Treatment</b>                               |                               |                           |                          | 0.8                  |
| Oxygen                                         | 246 (51%)                     | 186 (51%)                 | 60 (53%)                 |                      |
| CPAP                                           | 233 (49%)                     | 179 (49%)                 | 54 (47%)                 |                      |
| <b>Death in hospital</b>                       | 366 (76%)                     | 362 (99%)                 | 4 (3.5%)                 |                      |
| <b>Age</b>                                     | 77 (71, 83)                   | 79 (72, 84)               | 75 (70, 80)              | <0.001               |
| <b>Sex (Male)</b>                              | 307 (64%)                     | 235 (64%)                 | 72 (63%)                 | 0.8                  |
| <b>Ethnicity</b>                               |                               |                           |                          | 0.6                  |
| Black                                          | 8 (1.7%)                      | 5 (1.4%)                  | 3 (2.7%)                 |                      |
| Chinese                                        | 1 (0.2%)                      | 1 (0.3%)                  | 0 (0%)                   |                      |
| S Asian                                        | 26 (5.4%)                     | 19 (5.2%)                 | 7 (6.2%)                 |                      |
| White                                          | 443 (93%)                     | 340 (93%)                 | 103 (91%)                |                      |
| <b>Clinical Frailty Scale (Group)</b>          |                               |                           |                          | 0.7                  |
| (2,3]                                          | 116 (24%)                     | 84 (23%)                  | 32 (28%)                 |                      |
| (3,4]                                          | 113 (24%)                     | 87 (24%)                  | 26 (23%)                 |                      |
| (4,5]                                          | 152 (32%)                     | 120 (33%)                 | 32 (28%)                 |                      |
| (5,6]                                          | 98 (20%)                      | 74 (20%)                  | 24 (21%)                 |                      |
| <b>Urea (mmol/L)</b>                           | 9 (6, 13)                     | 10 (7, 14)                | 7 (5, 11)                | <0.001               |
| <b>CRP (mg/L)</b>                              | 131 (78, 196)                 | 136 (79, 203)             | 116 (62, 178)            | 0.12                 |
| <b>Recruitment FiO<sub>2</sub> (grouped)</b>   |                               |                           |                          | <0.001               |
| 0.4-0.59                                       | 154 (32%)                     | 105 (29%)                 | 49 (43%)                 |                      |
| 0.60-0.79                                      | 123 (26%)                     | 89 (24%)                  | 34 (30%)                 |                      |
| 0.80                                           | 202 (42%)                     | 171 (47%)                 | 31 (27%)                 |                      |
| <b>Recruitment RR</b>                          | 24.0 (20.0, 28.0)             | 24.0 (20.0, 30.0)         | 22.0 (20.0, 26.0)        | 0.001                |
| <b>Inclusion SpO<sub>2</sub> (%)</b>           | 92.0 (88.0, 94.0)             | 92.0 (88.0, 94.0)         | 93.0 (90.0, 95.0)        | 0.002                |
| <b>Max CPAP pressure (cm H<sub>2</sub>O)</b>   | 10.0 (10.0, 12.0)             | 10.0 (10.0, 12.0)         | 10.0 (8.0, 12.0)         | 0.030                |
| <b>Max CPAP FiO<sub>2</sub></b>                | 0.53 (0.46, 0.56)             | 0.53 (0.50, 0.60)         | 0.52 (0.38, 0.53)        | 0.002                |
| <b>Time on CPAP (days)</b>                     | 3.0 (1.0, 5.0)                | 2.0 (1.0, 5.0)            | 3.5 (1.2, 8.0)           | 0.015                |
| <b>CPAP discontinuation reason</b>             |                               |                           |                          | 0.058                |
| Clinician initiated withdrawal                 | 116 (50%)                     | 83 (46%)                  | 33 (61%)                 |                      |
| Patient initiated withdrawal                   | 117 (50%)                     | 96 (54%)                  | 21 (39%)                 |                      |
| <b>Palliative care referral</b>                | 233 (49%)                     | 218 (61%)                 | 15 (13%)                 | <0.001               |
| <b>Total admission (days)</b>                  | 8 (5, 17)                     | 7 (4, 14)                 | 18 (11, 28)              | <0.001               |
| <b>Time from admission to inclusion (days)</b> | 2 (0, 5)                      | 2 (0, 5)                  | 1 (0, 4)                 | 0.003                |
| <b>Time to death (days)</b>                    | 4.0 (2.0, 7.0)                | 4.0 (2.0, 7.0)            | NA (NA, NA)              |                      |

<sup>1</sup> n (%); Median (IQR)

<sup>2</sup> Pearson's Chi-squared test; Wilcoxon rank sum test; Fisher's exact test

Supplementary figure 7.tif

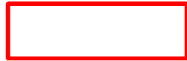

Indicates which variable is being directly manipulated in sensitivity analysis

a)

Sensitivity analysis i): Excluding Oxygen group patients with maximal  $FiO_2 > 0.6$ .

n=463

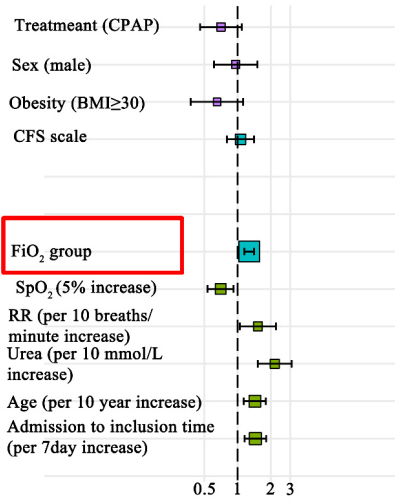

b)

Sensitivity analysis ii): Excluding patients with CPAP duration < 24 hours.

n=419

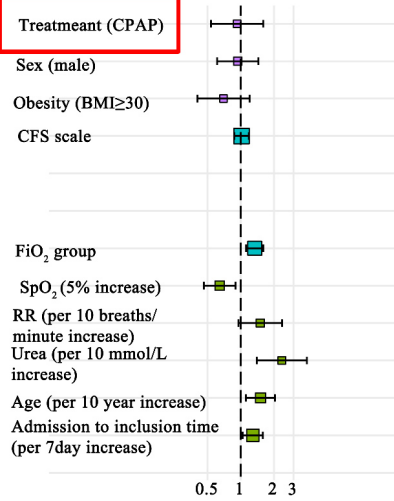

c)

Sensitivity analysis iii): Excluding patients with a prolonged time from admission to inclusion (>7 days)

n=355

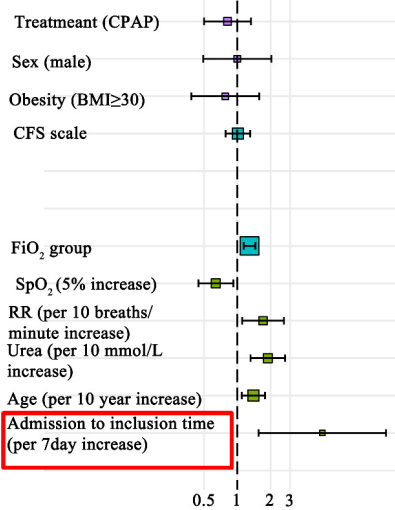

d)

Sensitivity analysis iv): Inclusion of age-obesity interaction term.

n= 479

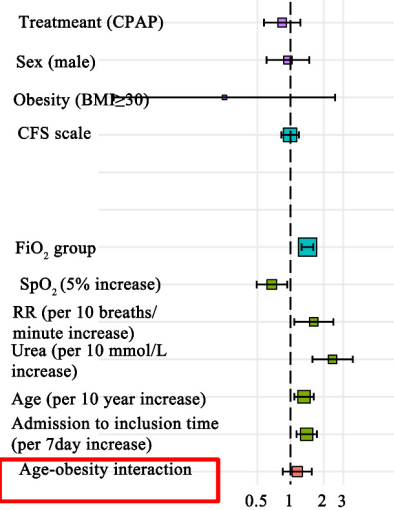

Supplementary figure 8 LZW.tif



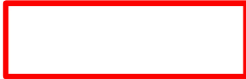

Indicates which variable is being directly manipulated in sensitivity analysis

e)

Sensitivity analysis v): Grouping CFS scale as per COMET study.<sup>19</sup>

n=479

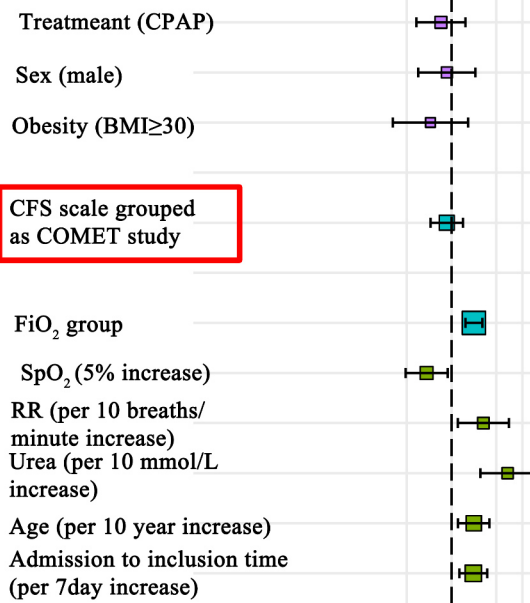

CFS scale grouped as COMET study

f)

Sensitivity analysis v): Grouping CFS scale as per ISARIC study.<sup>20</sup>

n=479

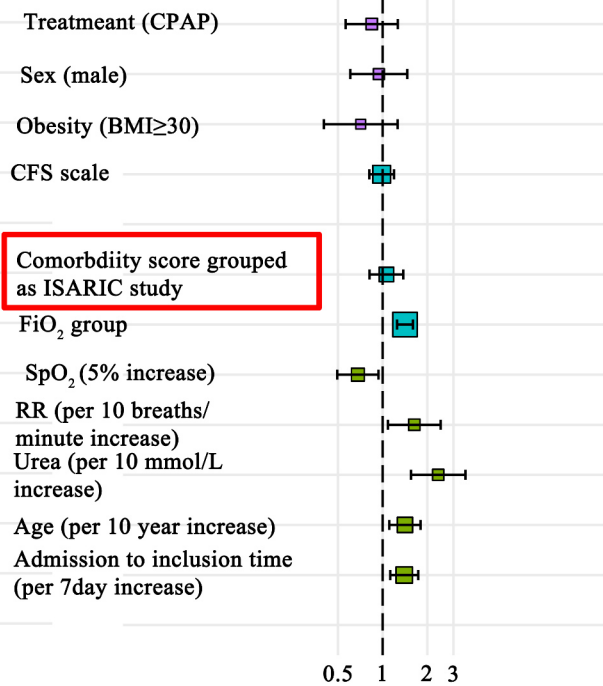

Comorbidity score grouped as ISARIC study

| Variable                         | Overall CPAP group<br>N = 233 <sup>1</sup> | CPAP Treatment sub-group                             |                                                    | p-value <sup>2</sup> |
|----------------------------------|--------------------------------------------|------------------------------------------------------|----------------------------------------------------|----------------------|
|                                  |                                            | CPAP, clinician discontinued<br>N = 116 <sup>1</sup> | CPAP, patient discontinued<br>N = 117 <sup>1</sup> |                      |
| Age                              | 77 (70, 82)                                | 76 (69, 81)                                          | 78 (71, 82)                                        | 0.080                |
| Sex (male)                       | 156 (67%)                                  | 73 (63%)                                             | 83 (71%)                                           | 0.2                  |
| CFS                              | 5 (4, 5)                                   | 4.5 (3, 6)                                           | 5 (4, 5)                                           | 0.97                 |
| <b>Comorbidity score group</b>   |                                            |                                                      |                                                    | 0.6                  |
| A (0,1)                          | 80 (34%)                                   | 39 (34%)                                             | 41 (35%)                                           |                      |
| B (2)                            | 74 (32%)                                   | 34 (29%)                                             | 40 (34%)                                           |                      |
| C (3-5)                          | 79 (34%)                                   | 43 (37%)                                             | 36 (31%)                                           |                      |
| <b>Inclusion FiO<sub>2</sub></b> |                                            |                                                      |                                                    | 0.3                  |
| 0.35-0.59                        | 51 (22%)                                   | 22 (19%)                                             | 29 (25%)                                           |                      |
| 0.6-0.79                         | 65 (28%)                                   | 37 (32%)                                             | 28 (24%)                                           |                      |
| 0.8                              | 117 (50%)                                  | 57 (49%)                                             | 60 (51%)                                           |                      |
| Inclusion RR                     | 26 (22, 30)                                | 25 (22, 30)                                          | 26 (22, 31)                                        | 0.8                  |
| Inclusion SpO <sub>2</sub>       | 92 (88, 95)                                | 91.5 (87, 95)                                        | 92 (88, 95)                                        | 0.5                  |

Supplementary figure 9.tif
